# Supplementary material
Source: bioRxiv or medRxiv preprint supplement (http://biorxiv.org/highwire/filestream/133573/field_highwire_adjunct_files/4/319723-2.pdf)

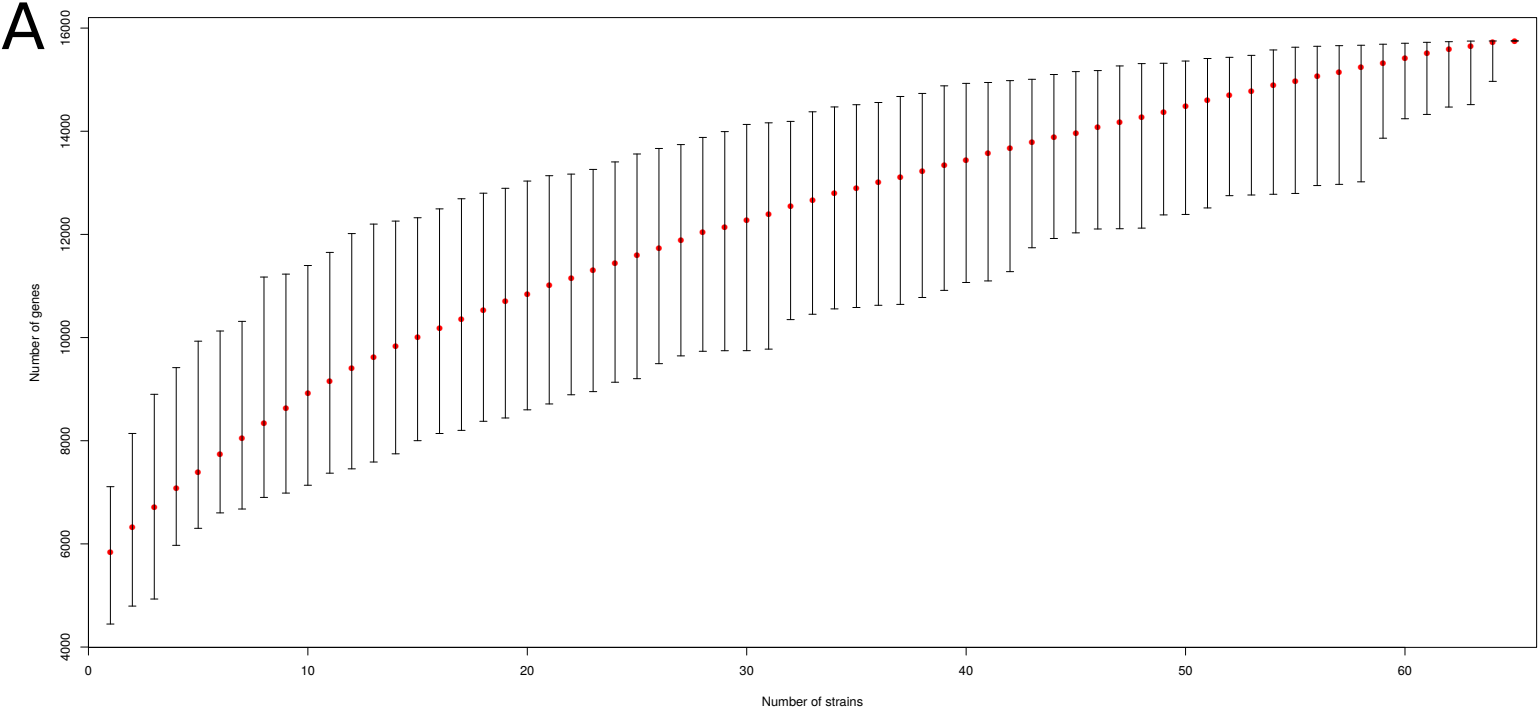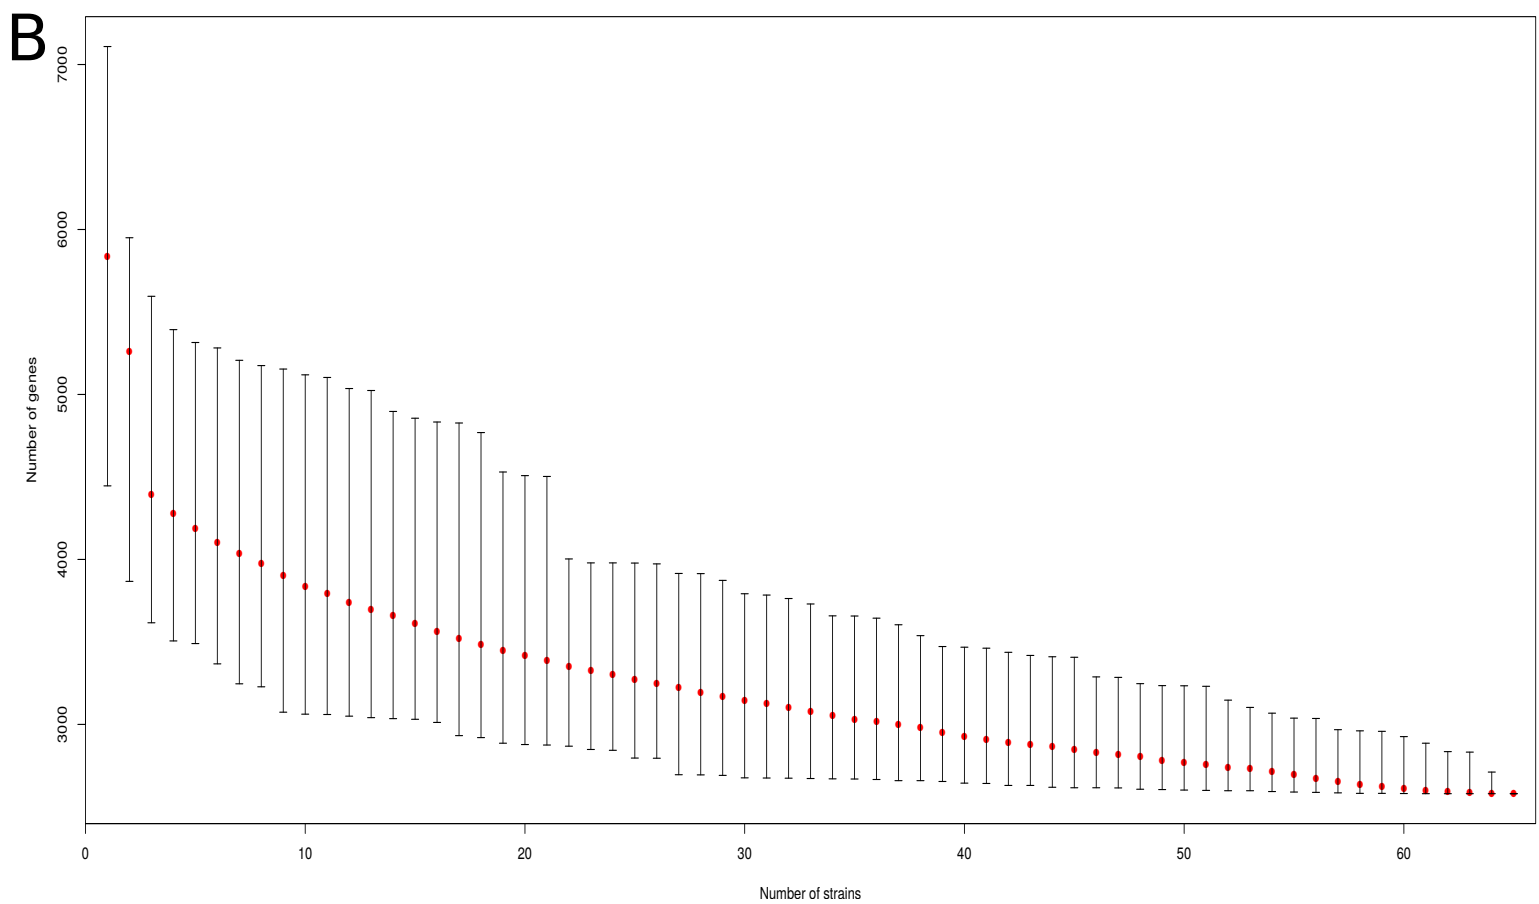

Supplement: Supplementary file [file 319723-2.pdf]
